# Supplementary material for: Physicochemical, Pharmacokinetic, and Toxicity Evaluation of Soluplus® Polymeric Micelles Encapsulating Fenbendazole
Source: PubMed Central journal article supplement (PMC7589096; doi:10.3390/pharmaceutics12101000), 2020-10-21
Supplement: pharmaceutics-12-01000-s001.pdf [file pharmaceutics-12-01000-s001.pdf]

# Supplementary Materials: Physicochemical, Pharmacokinetic, and Toxicity Evaluation of Soluplus<sup>®</sup> Polymeric Micelles Encapsulating Fenbendazole

Ik Sup Jin, Min Jeong Jo, Chun-Woong Park, Youn Bok Chung, Jin-Seok Kim and Dae Hwan Shin\*

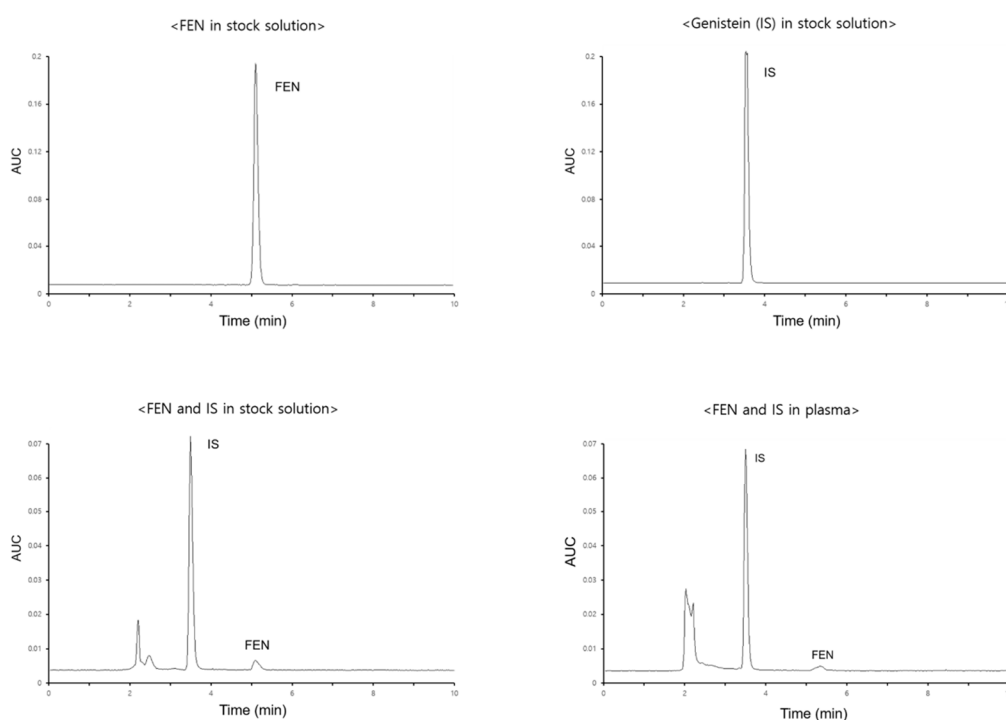

**Figure S1.** Representative chromatograms of fenbendazole (FEN) and genistein (internal standard [IS]) in stock solution and biological plasma sample.
